# Supplementary material
Source: PubMed Central journal article supplement (PMC7834645)
Supplement: mmc1.pdf [file mmc1.pdf]

# THE LANCET

## Global Health

### Supplementary appendix

This appendix formed part of the original submission. We post it as supplied by the authors.

Supplement to: Dehingia N, Raj A. Sex differences in COVID-19 case fatality: do we know enough? *Lancet Glob Health* 2020; published online Nov 5.  
[http://dx.doi.org/10.1016/S2214-109X\(20\)30464-2](http://dx.doi.org/10.1016/S2214-109X(20)30464-2).

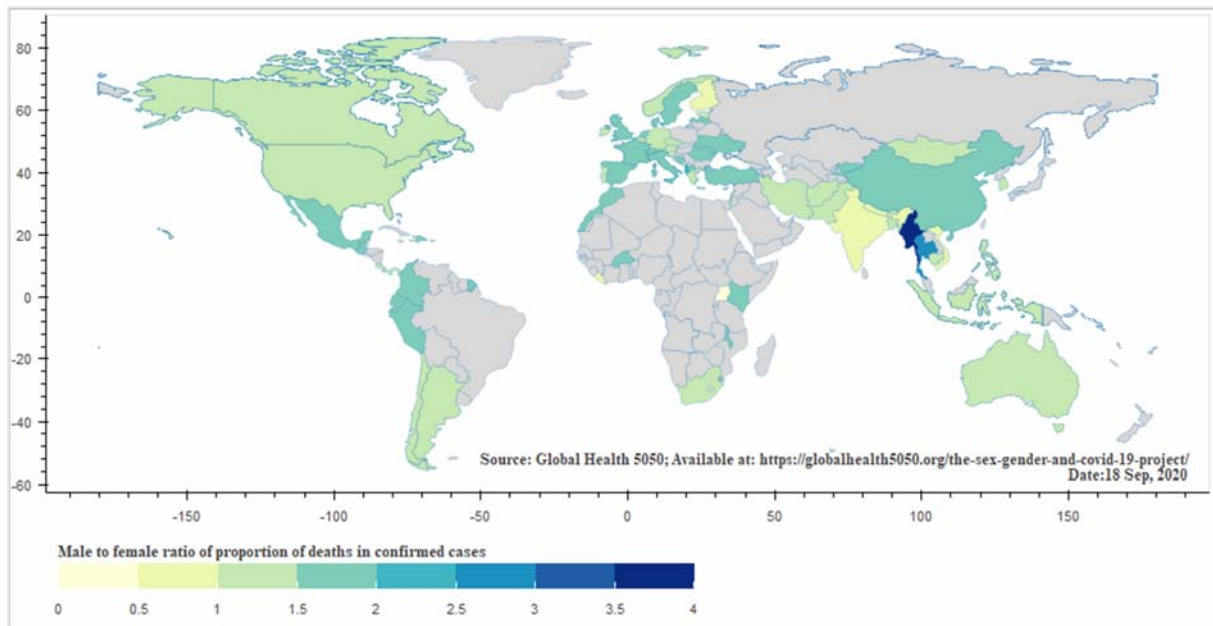

**Figure: Male to female ratio of COVID-19 deaths in confirmed cases, by country**
